# Supplementary material
Source: MDPI journal article supplement (https://www.mdpi.com/2036-7481/14/3/98)
Supplement: s1 [file s1]

## Supplementary Material

Postbiotics of the *Lactiplantibacillus plantarum* EIR/IF-1 strain show antimicrobial activity against oral microorganisms with pH adaptation capability

MICROBIOLOGY RESEARCH

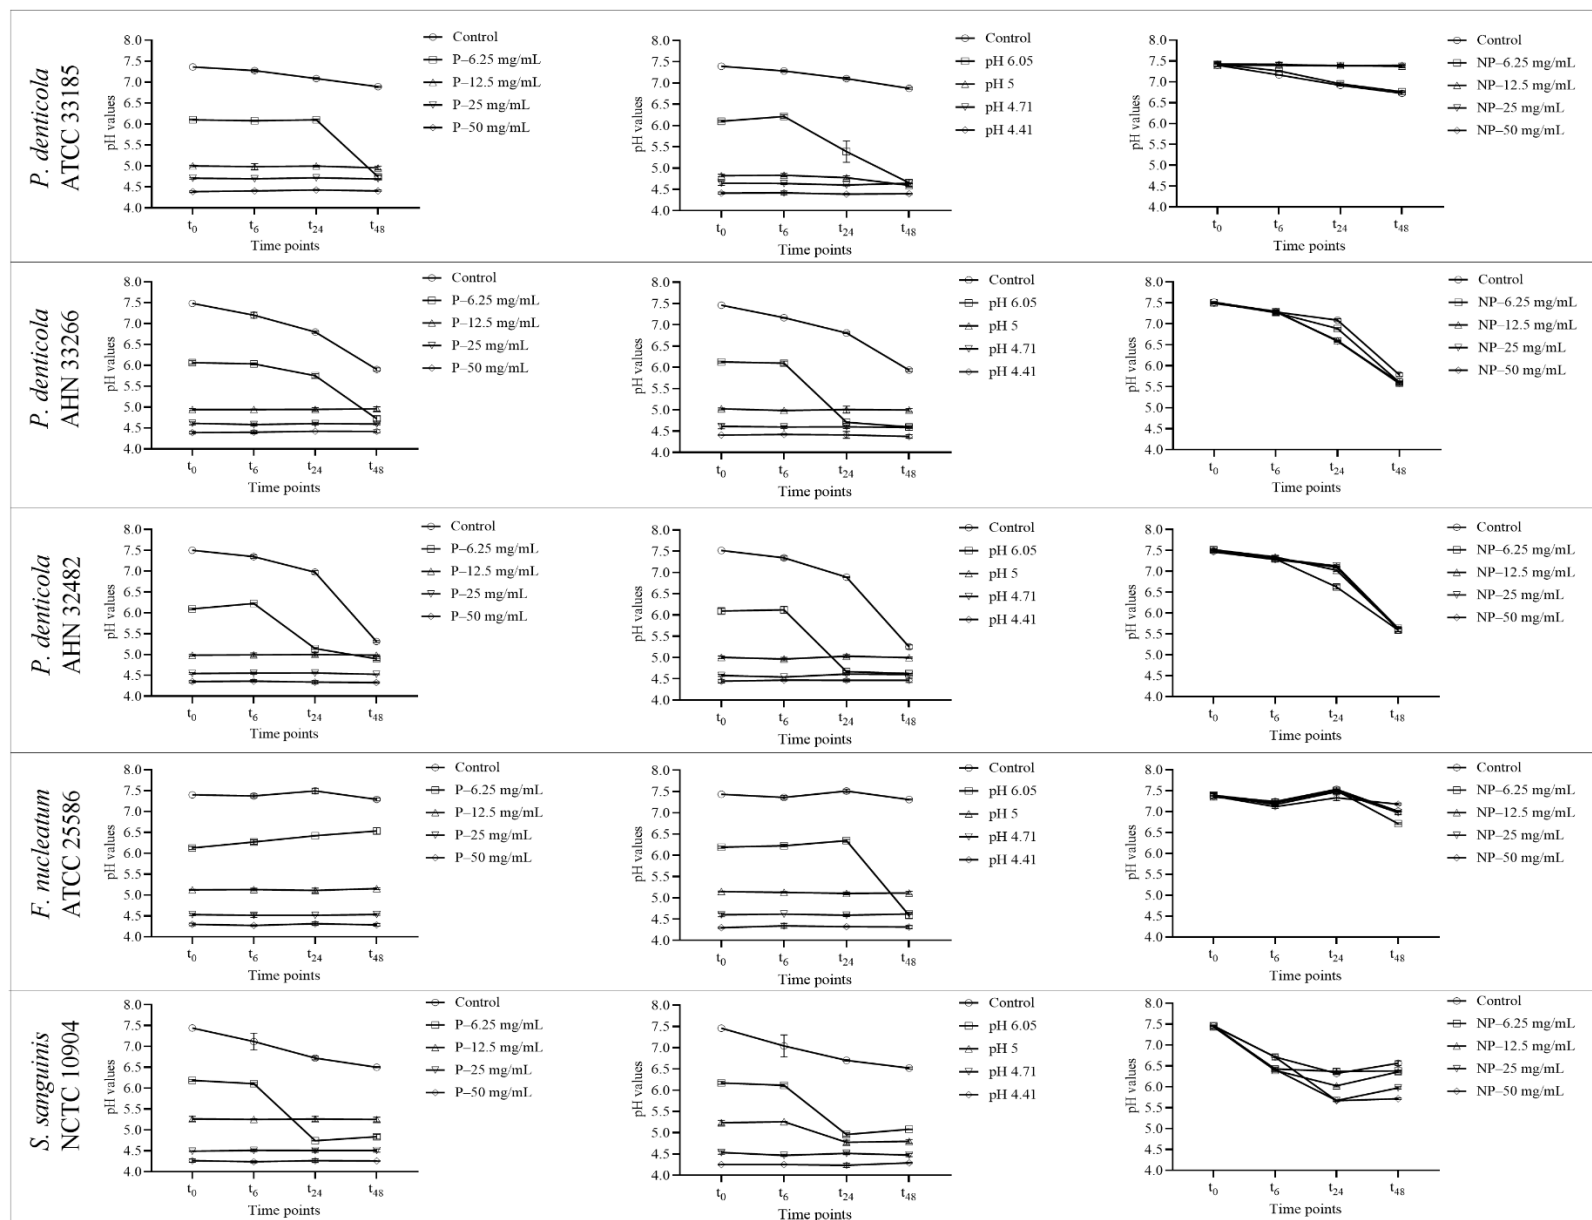

**Figure S1.** pH changes in culture media with different concentrations of crude postbiotics, media acidified with HCl, or with different concentrations of neutralized postbiotics. P; crude postbiotics, acidified media with HCl (average pH values corresponding to pH values of culture media adjusted with different concentrations of crude postbiotics), NP; neutralized postbiotics (pH 7). Each row represents a different strain, the bars indicate the standard deviation

**Table S1.** Microbial growth after recovery

| <i>P. denticola</i> ATCC 33185  |            |             |          |          |
|---------------------------------|------------|-------------|----------|----------|
| Time points                     | 6.25 mg/mL | 12.50 mg/mL | 25 mg/mL | 50 mg/mL |
| t6 <sup>a</sup> -C <sup>d</sup> | +          | +           | -        | -        |
| t6-N <sup>e</sup>               | +          | +           | +        | -        |
| t6-A <sup>f</sup>               | +          | +           | -        | -        |
| t24 <sup>b</sup> -C             | +          | +           | -        | -        |
| t24-N                           | +          | +           | -        | -        |
| t24-A                           | +          | +           | -        | -        |
| t48 <sup>c</sup> -C             | +          | -           | -        | -        |
| t48-N                           | -          | -           | -        | -        |
| t48-A                           | +          | -           | -        | -        |
| <i>P. denticola</i> AHN 32366   |            |             |          |          |
| Time points                     | 6.25 mg/mL | 12.50 mg/mL | 25 mg/mL | 50 mg/mL |
| t6 <sup>a</sup> -C <sup>d</sup> | +          | +           | -        | -        |
| t6-N <sup>e</sup>               | +          | +           | +        | +        |
| t6-A <sup>f</sup>               | +          | +           | -        | -        |
| t24 <sup>b</sup> -C             | +          | +           | -        | -        |
| t24-N                           | +          | +           | +        | +        |
| t24-A                           | +          | +           | -        | -        |
| t48 <sup>c</sup> -C             | +          | +           | -        | -        |
| t48-N                           | +          | +           | +        | +        |
| t48-A                           | +          | +           | -        | -        |
| <i>P. denticola</i> AHN 32482   |            |             |          |          |
| Time points                     | 6.25 mg/mL | 12.50 mg/mL | 25 mg/mL | 50 mg/mL |
| t6 <sup>a</sup> -C <sup>d</sup> | +          | +           | -        | -        |
| t6-N <sup>e</sup>               | +          | +           | +        | +        |
| t6-A <sup>f</sup>               | +          | +           | -        | -        |
| t24 <sup>b</sup> -C             | +          | +           | -        | -        |
| t24-N                           | +          | +           | +        | +        |
| t24-A                           | +          | +           | -        | -        |
| t48 <sup>c</sup> -C             | +          | +           | -        | -        |
| t48-N                           | +          | +           | +        | +        |
| t48-A                           | +          | +           | -        | -        |
| <i>F. nucleatum</i> ATCC 25586  |            |             |          |          |
| Time points                     | 6.25 mg/mL | 12.50 mg/mL | 25 mg/mL | 50 mg/mL |
| t6 <sup>a</sup> -C <sup>d</sup> | +          | +           | -        | -        |
| t6-N <sup>e</sup>               | +          | +           | +        | +        |
| t6-A <sup>f</sup>               | +          | +           | -        | -        |
| t24 <sup>b</sup> -C             | +          | +           | -        | -        |
| t24-N                           | +          | +           | +        | +        |
| t24-A                           | +          | -           | -        | -        |
| t48 <sup>c</sup> -C             | +          | -           | -        | -        |
| t48-N                           | +          | +           | +        | +        |
| t48-A                           | +          | -           | -        | -        |
| <i>S. sanguinis</i> NCTC 10904  |            |             |          |          |
| Time points                     | 6.25 mg/mL | 12.50 mg/mL | 25 mg/mL | 50 mg/mL |

|                                     |   |   |   |   |
|-------------------------------------|---|---|---|---|
| <b>t6<sup>a</sup>-C<sup>d</sup></b> | + | + | - | - |
| <b>t6-N<sup>e</sup></b>             | + | + | + | + |
| <b>t6-A<sup>f</sup></b>             | + | + | - | - |
| <b>t24<sup>b</sup>-C</b>            | + | + | - | - |
| <b>t24-N</b>                        | + | + | + | + |
| <b>t24-A</b>                        | + | + | - | - |
| <b>t48<sup>c</sup>-C</b>            | + | - | - | - |
| <b>t48-N</b>                        | + | + | + | + |
| <b>t48-A</b>                        | + | + | - | - |

Legends: <sup>a</sup>6<sup>th</sup> hour; <sup>b</sup>24<sup>th</sup> hour; <sup>c</sup>48<sup>th</sup> hour; <sup>d</sup>crude postbiotics; <sup>e</sup>neutralized postbiotics; <sup>f</sup>acidified media; “+” growth after recovery; “-” no growth after recovery
